# Supplementary material for: Evaluation of snow processes over the Western United States in E3SM land model
Source: Copernicus journal article supplement (doi:10.5194/egusphere-2022-1097), 2022-10-17
Supplement: Supplementary file 2 [file egusphere-2022-1097-supplement.pdf]

## **Supplementary Materials for**

# **Evaluation of snow processes over the Western United States in E3SM land model**

Dalei Hao<sup>1</sup>, Gautam Bisht<sup>1</sup>, Karl Rittger<sup>2</sup>, Timbo Stillinger<sup>3</sup>, Edward Bair<sup>3</sup>, Yu Gu<sup>4</sup>, L. Ruby Leung<sup>1</sup>

<sup>1</sup>Atmospheric Sciences and Global Change Division, Pacific Northwest National Laboratory, Richland, WA, USA  
Laboratory

<sup>2</sup>Institute for Arctic and Alpine Research, University of Colorado, Boulder, CO, USA

<sup>3</sup>Earth Research Institute, University of California, Santa Barbara, CA, USA

<sup>4</sup>Joint Institute for Regional Earth System Science and Engineering and Department of Atmospheric and Oceanic Sciences, University of California, Los Angeles, CA, USA

*Correspondence to:* dalei.hao@pnnl.gov

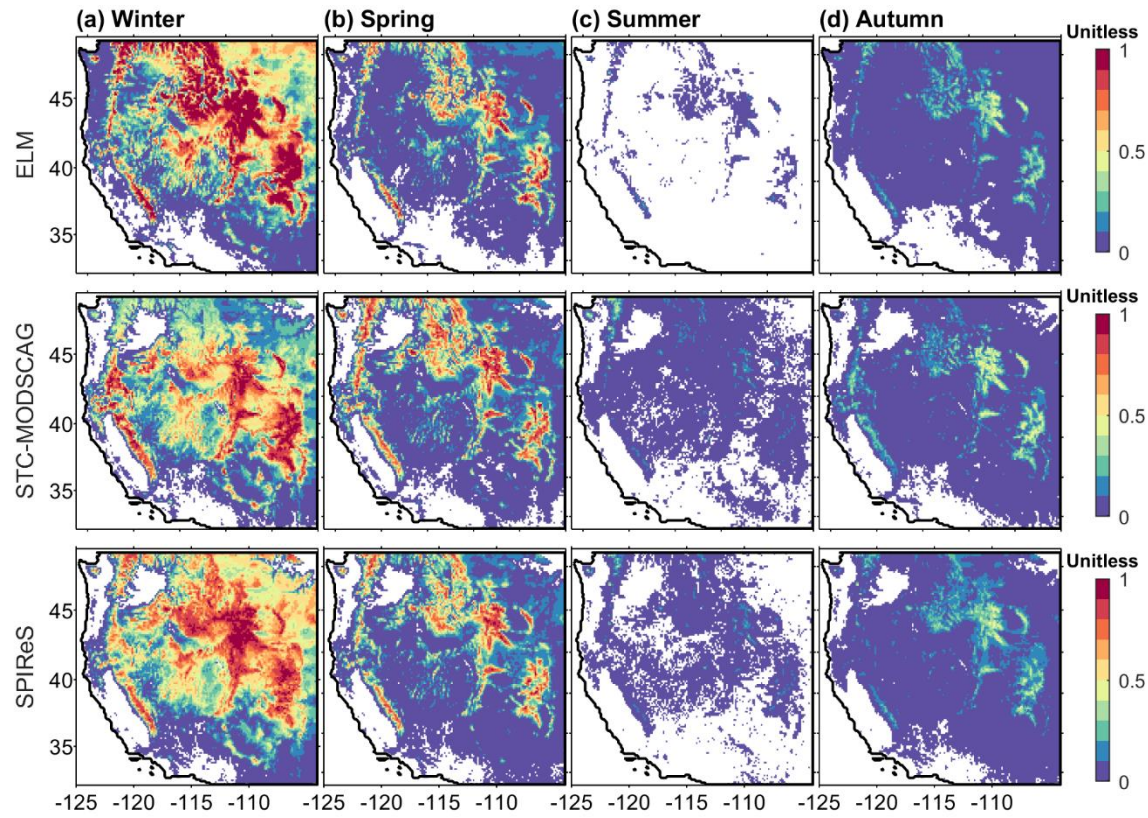

**Figure S1: Spatial distributions of  $f_{\text{sno}}$  in ELM and two remote sensing products (i.e., STC-MODSCAG and SPIReS) for different seasons: (a) winter, (b) spring, (c) summer and (d) autumn. In all panels, regions with no snow cover are masked with white color.**

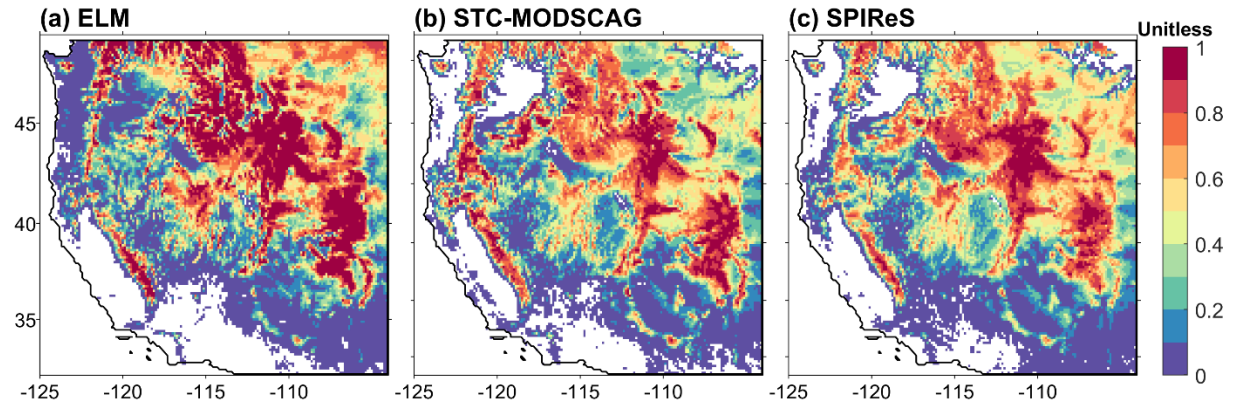

**Figure S2: Spatial distributions of  $f_{sno}$  in ELM and two remote sensing products (i.e., STC-MODSCAG and SPIReS) for February.**

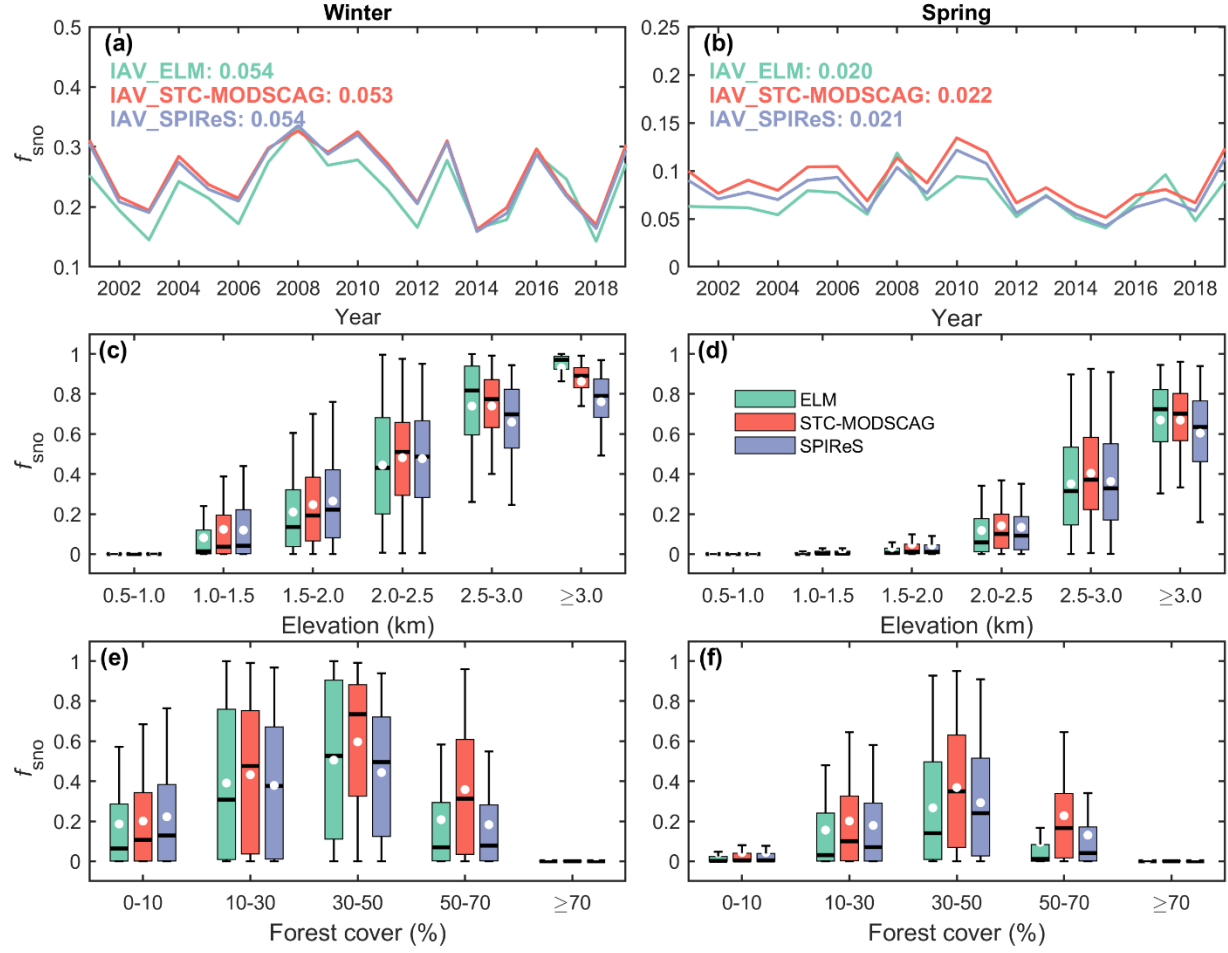

**Figure S3: (a,b) Time series of regional average values, (c,d) elevation gradients, and (e,f) change with forest cover of  $f_{sno}$  in ELM (green), STC-MODSCAG (red), and SPIReS (blue) over the WUS regions below  $42^\circ$  in latitude. Panels (a,c,e) are for winter and panels (b,d,f) are for spring. In panels (c-f), the white dots represent the average values.**

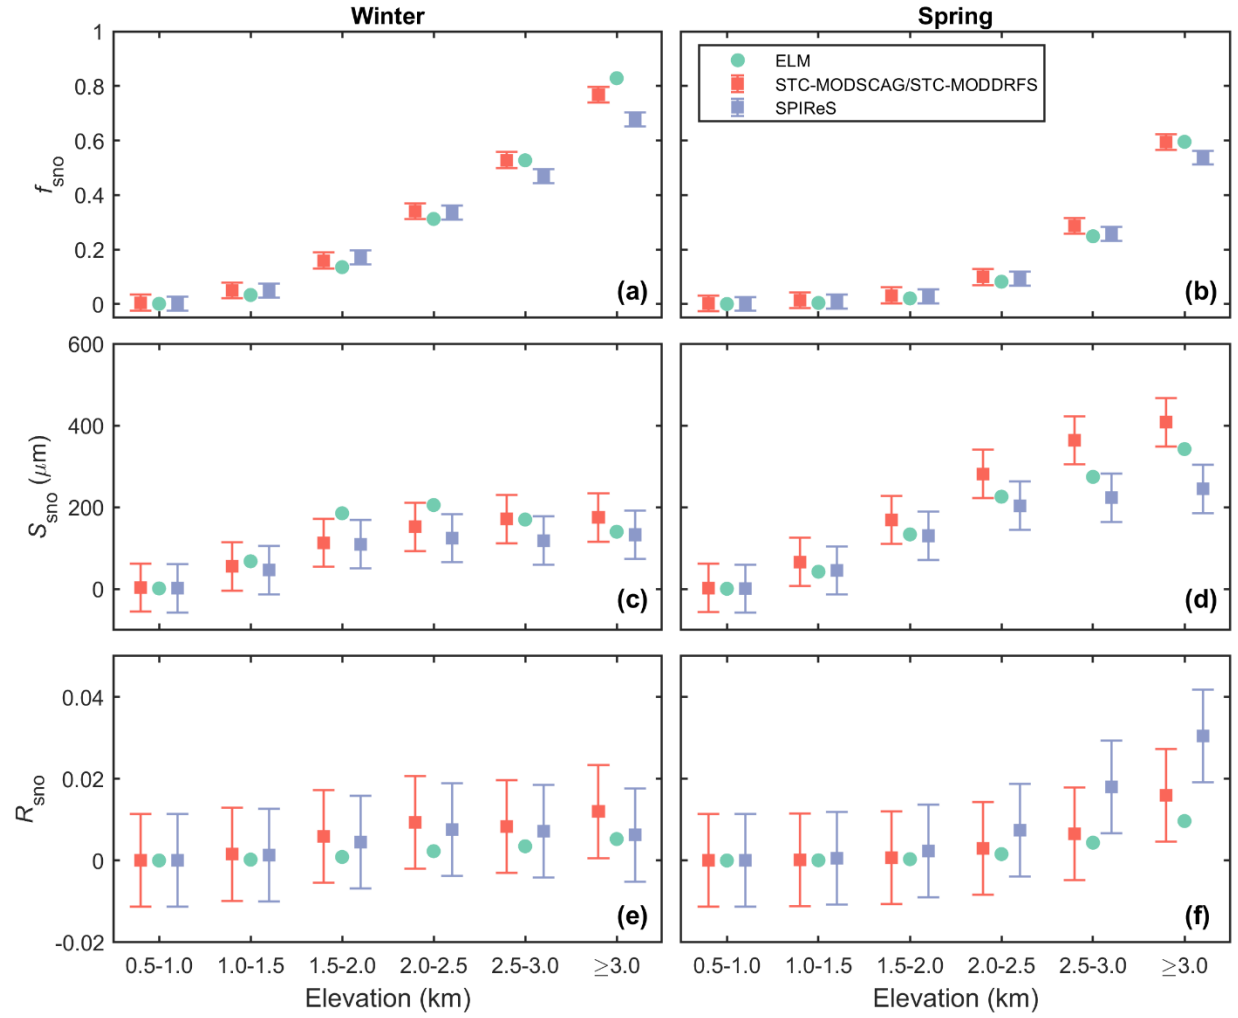

**Figure S4: The area-weighted average (a,b)  $f_{\text{sno}}$ , (c,d)  $S_{\text{sno}}$  and (e,f)  $R_{\text{sno}}$  for (a,c,e) winter and (b,d,f) spring of ELM (green), STC-MODSCAG/STC-MODDRFS (red) and SPIReS (blue) over the WUS regions below  $42^\circ$  in latitude. The bar width represents the uncertainty bounds of STC-MODSCAG/STC-MODDRFS and SPIReS from (Bair et al., 2021a).**

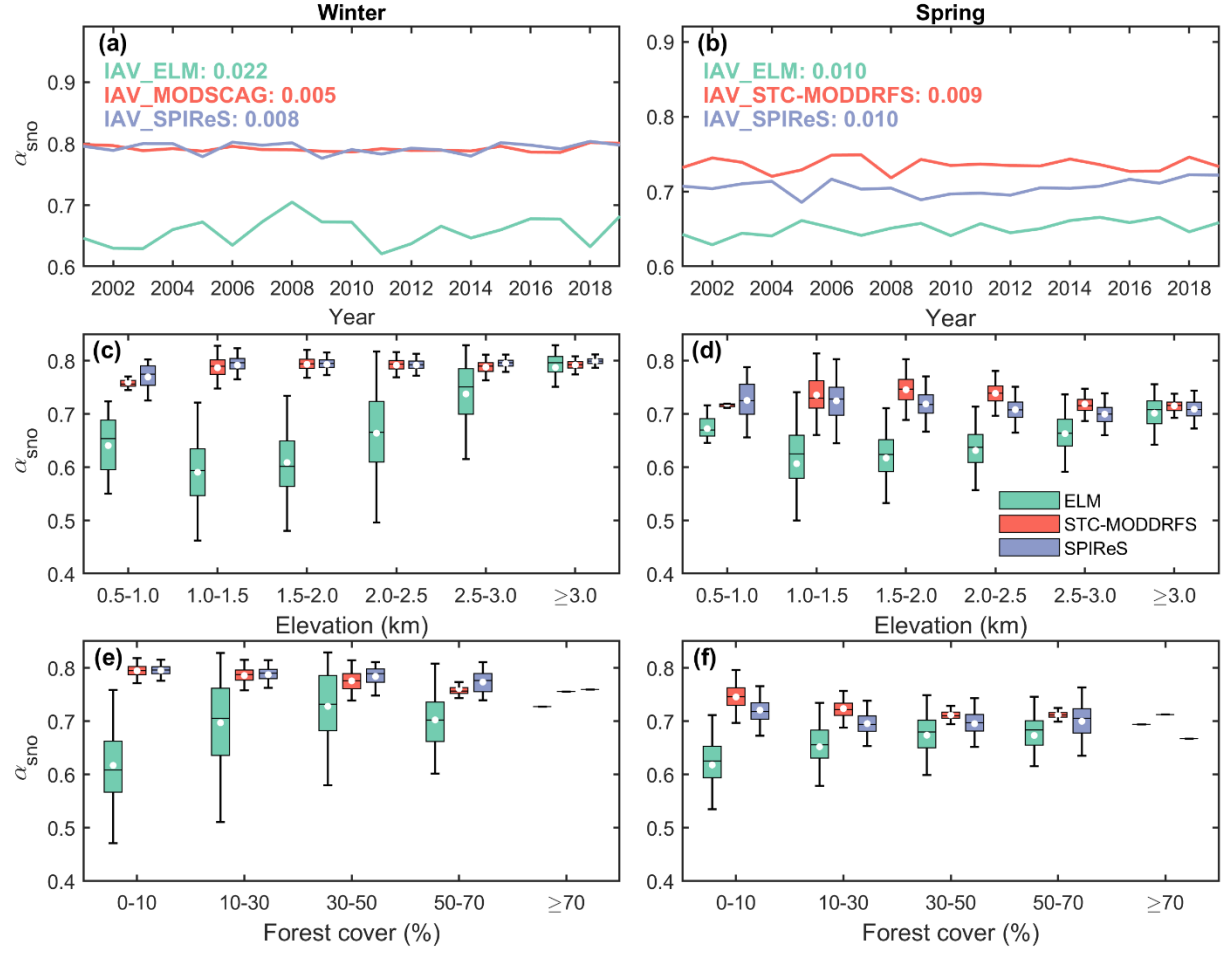

**Figure S5: (a,b) Time series of regional average values, (c,d) elevation gradients, and (e,f) change with forest cover of  $\alpha_{sno}$  in ELM (green), STC-MODSCAG (red), and SPIReS (blue) over the WUS regions below  $42^\circ$  in latitude. Panels (a,c,e) are for winter and panels (b,d,f) are for spring. In panels (c-f), the white dots represent the average values.**

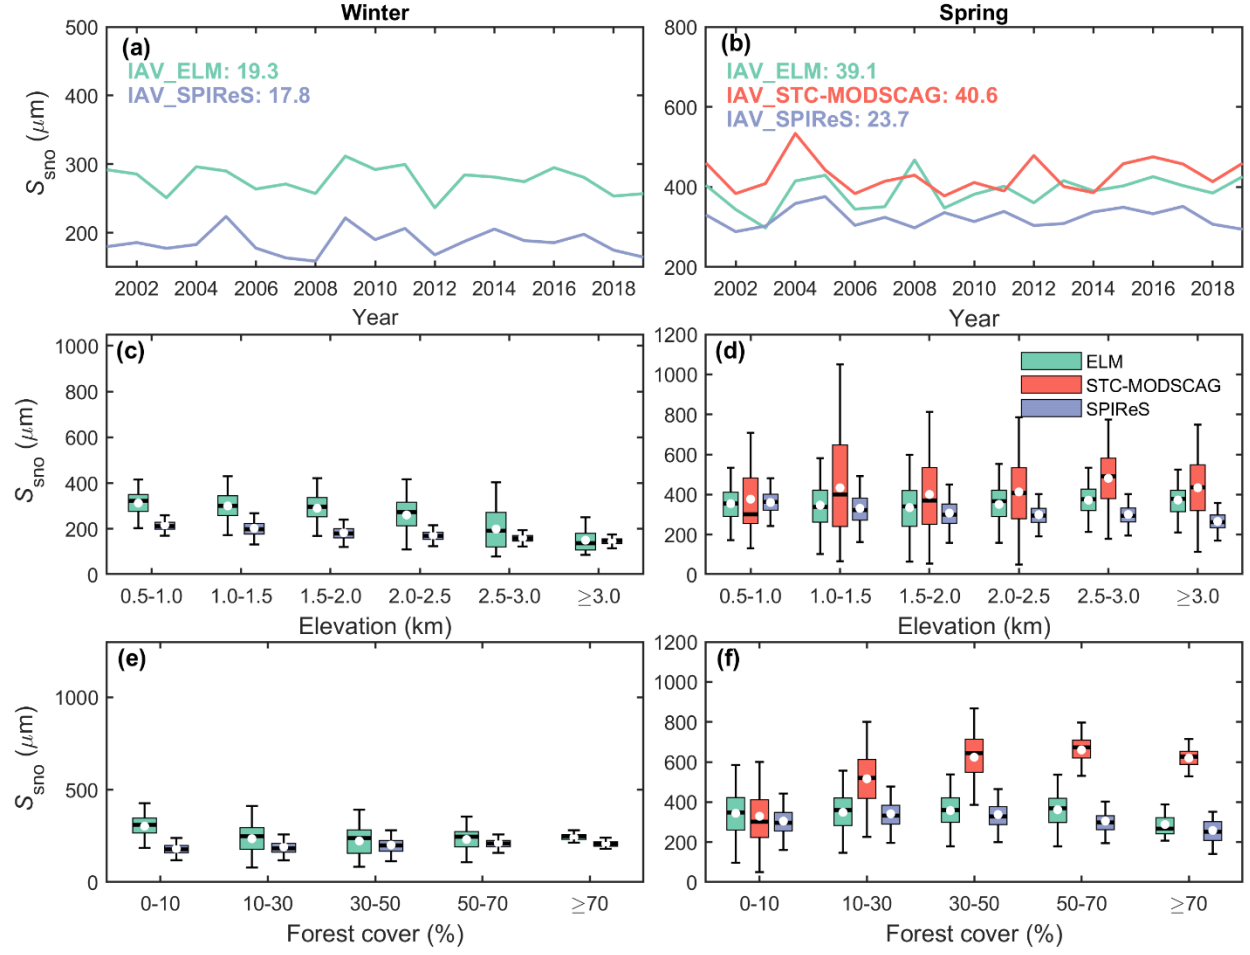

**Figure S6: (a,b) Time series of regional average values, (c,d) elevation gradients, and (e,f) change with forest cover of  $S_{sno}$  in ELM (green), STC-MODSCAG (red), and SPIReS (blue) over the WUS. Panels (a,c,e) are for winter and panels (b,d,f) are for spring. In panels (c-f), the white dots represent the average values.**

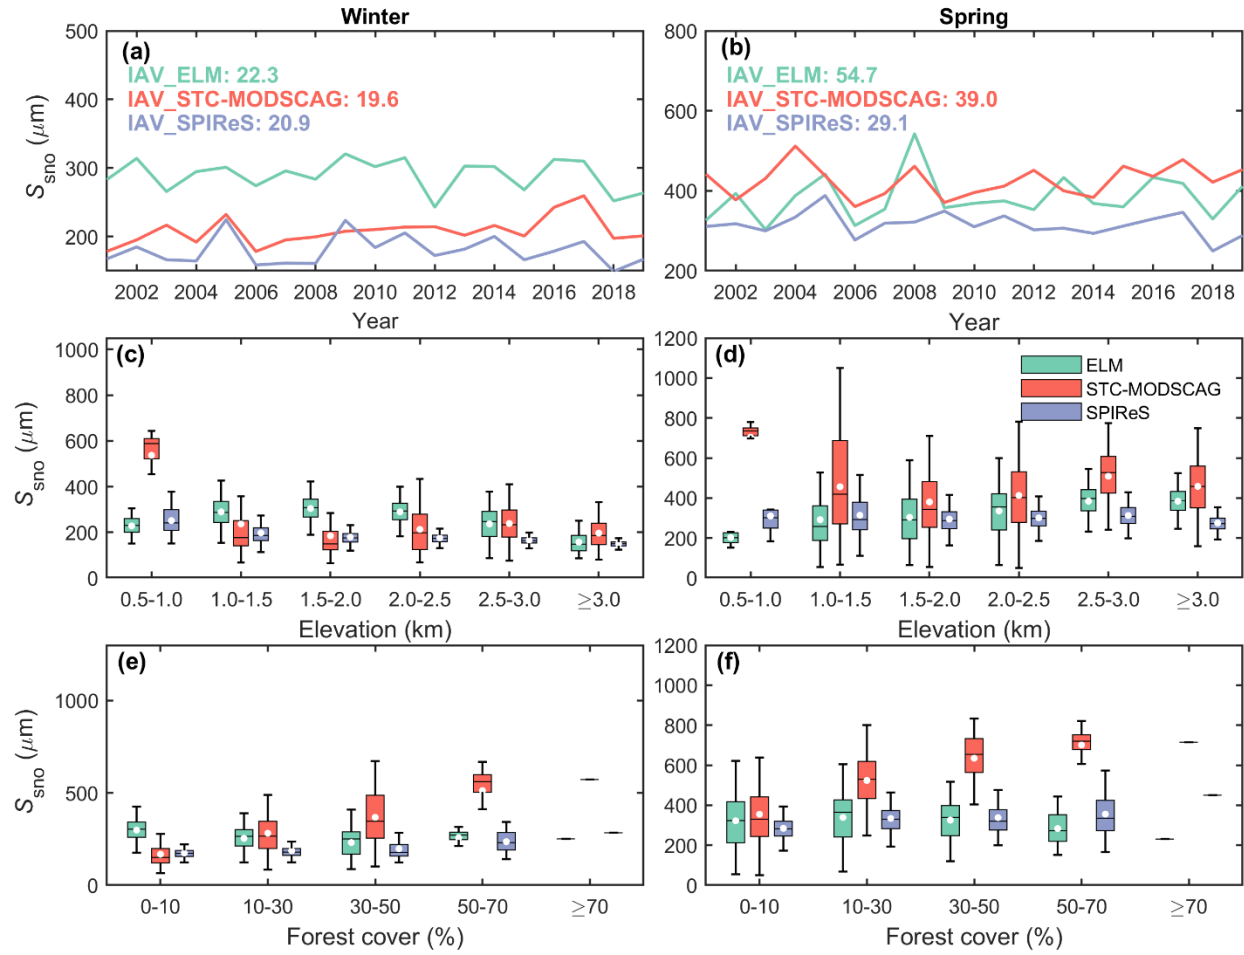

**Figure S7:** Same as Figure S6, except for the statistics over the WUS regions below  $42^\circ$  in latitude.



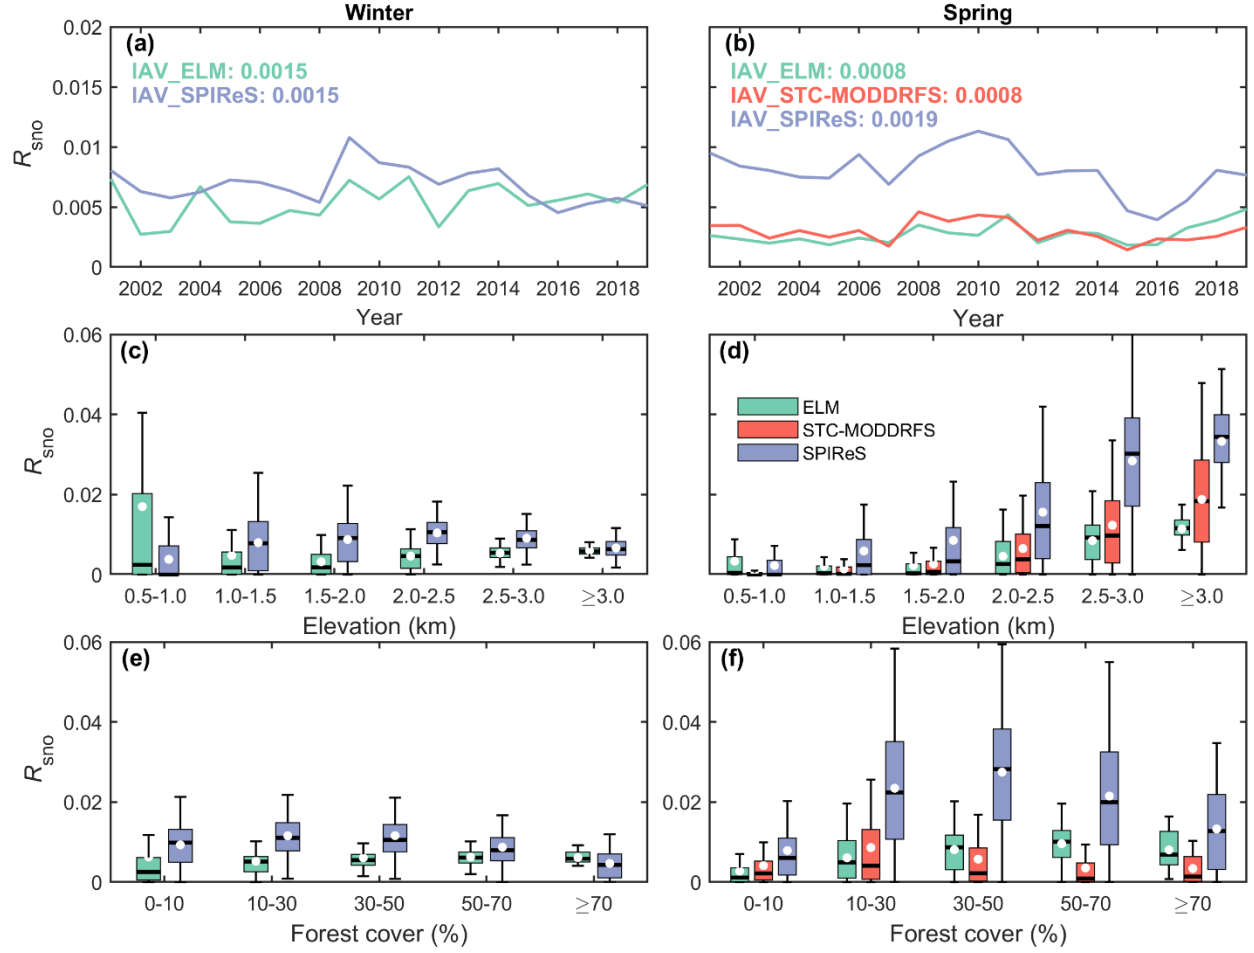

**Figure S8: (a,b) Time series of regional average values, (c,d) elevation gradients, and (e,f) change with forest cover of  $R_{sno}$  in ELM (green), STC-MODSCAG (red), and SPIReS (blue) over the WUS. Panels (a,c,e) are for winter and panels (b,d,f) are for spring. In panels (c-f), the white dots represent the average values.**

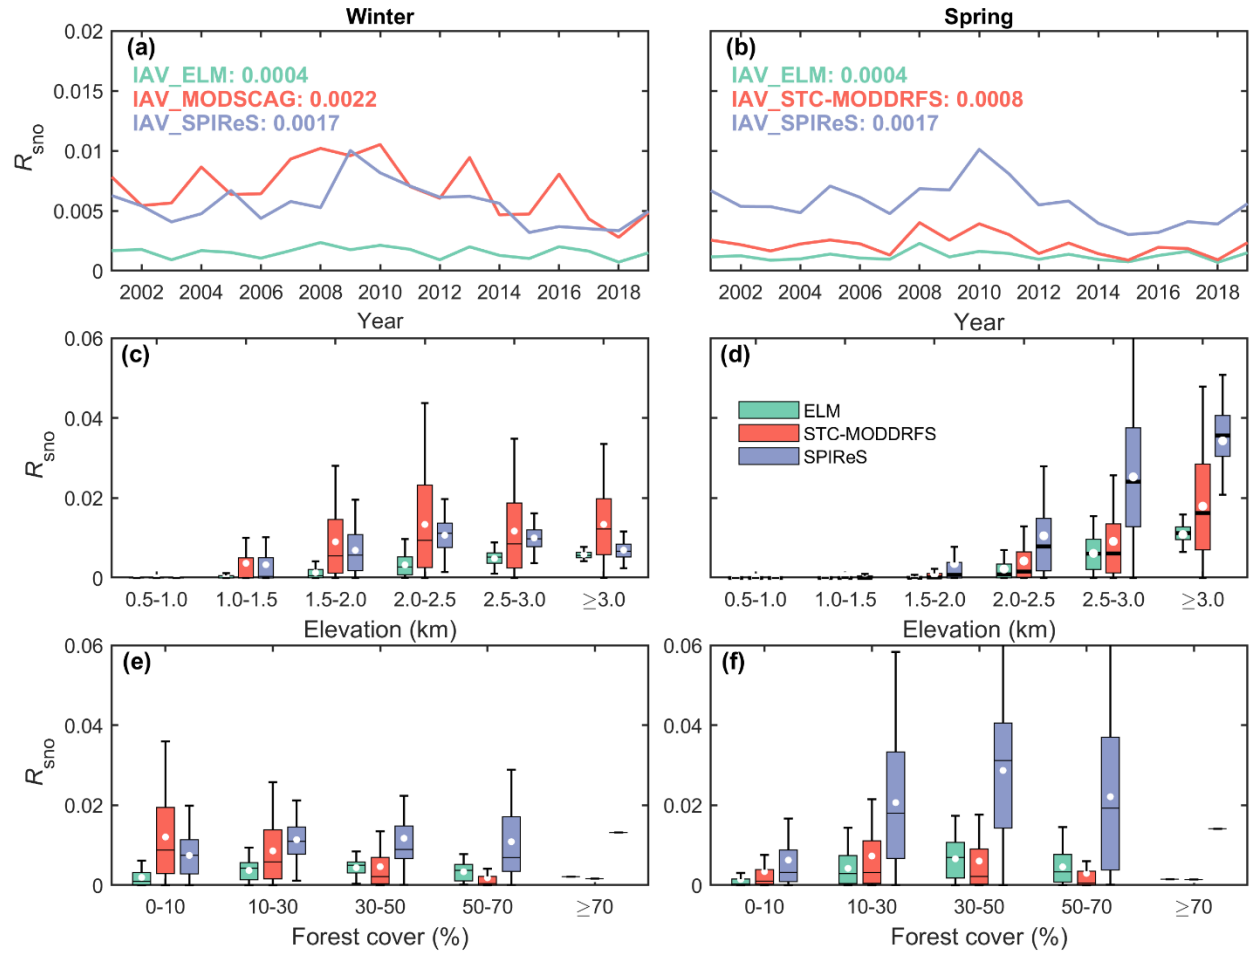

**Figure S9: Same as Figure S8, except for the statistics over the WUS regions below 42° in latitude.**

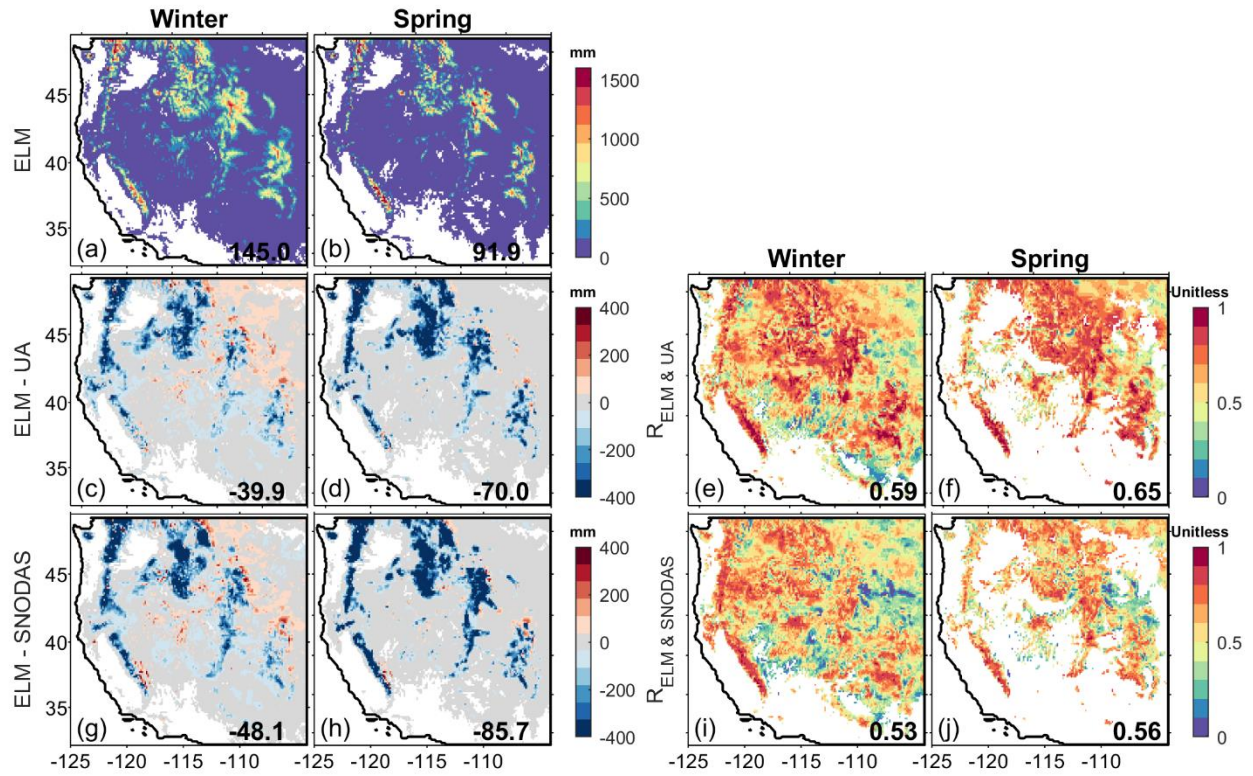

**Figure S10:** Spatial distributions of (a,b)  $D_{sno}$  in ELM and (c,d,g,h) the  $D_{sno}$  difference between ELM and two remote sensing products (i.e., MODSCAG and SPIReS) and (e,f,i,j) their temporal correlations ( $R_s$ ) for different seasons: (a,c,e,g,i) winter and (b,d,f,h,j) spring. In all panels, regions with no snow cover are masked with white color. The area-weighted average values are labelled in each panel.

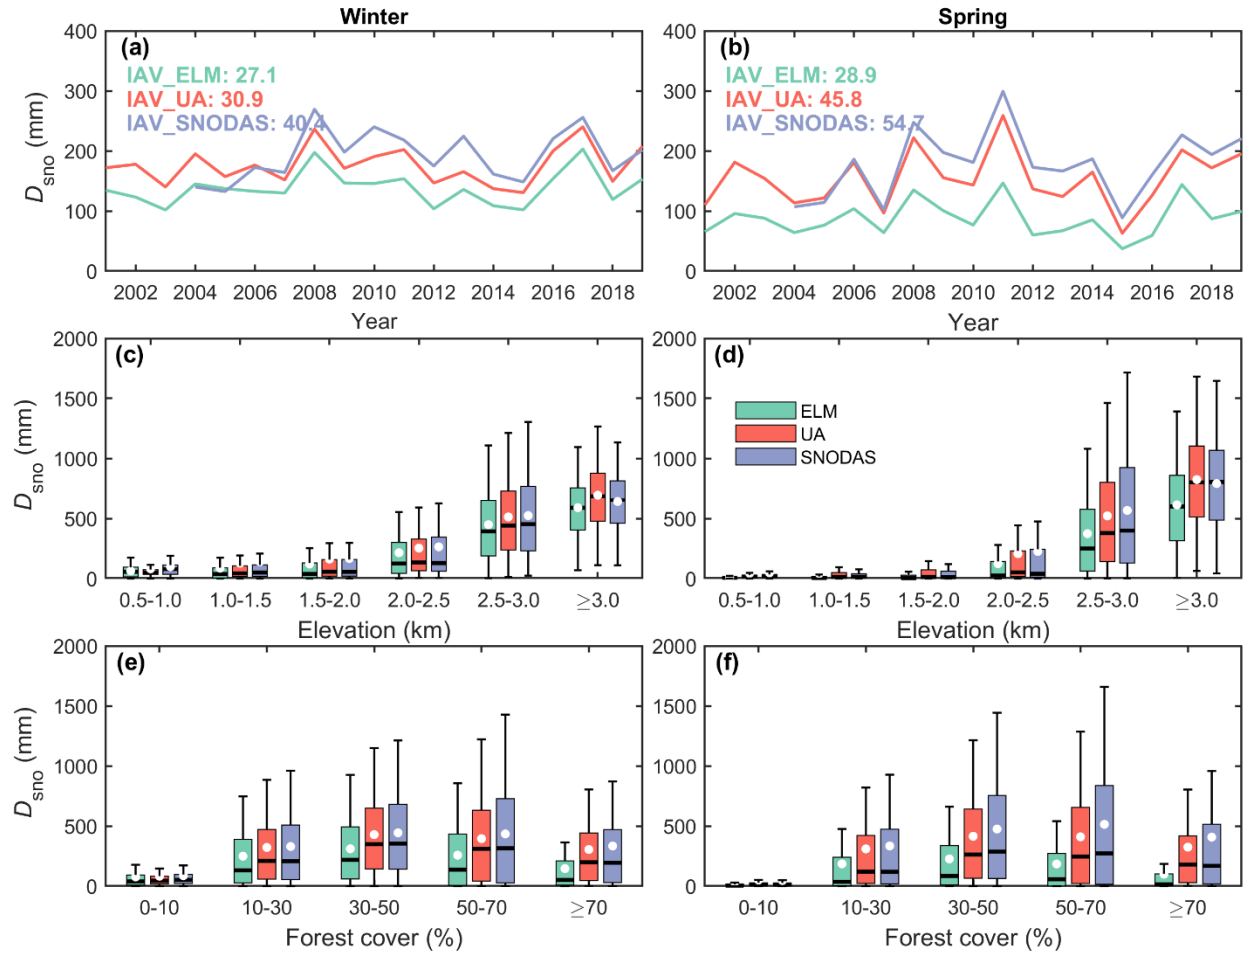

**Figure S11: (a,b) Time series of regional average values, (c,d) elevation gradients, and (e,f) change with forest cover of  $D_{sno}$  in ELM (green), UA (red), and SNODAS (blue) over the WUS. Panels (a,c,e) are for winter and panels (b,d,f) are for spring. In panels (c-f), the white dots represent the average values.**
