# Supplementary material for: Evaluation of snow processes over the Western United States in E3SM land model
Source: Copernicus journal article supplement (doi:10.5194/egusphere-2022-1097), 2022-10-17
Supplement: Supplementary file [file egusphere-2022-1097-AC4-supplement.pdf]

Dear Editors and Reviewers,

Thank you very much for your detailed and constructive comments and suggestions for our manuscript. We found the comments very helpful for improving our manuscript and have revised the manuscript accordingly.

Below are the major revisions that we have made:

1. We have added more discussion about the snow season definitions, model evaluation on the spatio-temporal correlation, propagation of uncertainty in the snow variables, and the potential differences between land-only and coupled simulations.
2. We have revised the title as “**Evaluation of E3SM Land Model snow simulations over the Western United States**” according to the comments from Reviewers 1 and 2.

The itemized responses to the comments and suggestions from the editors and reviewers are provided below in **blue** font. We hope our responses address the concerns raised in the last round of review and look forward to your decision on the publication of our manuscript.

Best regards,

Dalei Hao (on the behalf of all authors)
